# Supplementary material for: Prevalence and Antimicrobial Resistance Profiles of Salmonella Species and Escherichia coli Isolates from Poultry Feeds in Ruiru Sub - County, Kenya
Source: Research Square preprint supplement (doi:10.21203/rs.3.rs-94393/v1), 2020-10-21
Supplement: Supplementary file 1 [file 9923dbade511c4e5922451f0.docx]

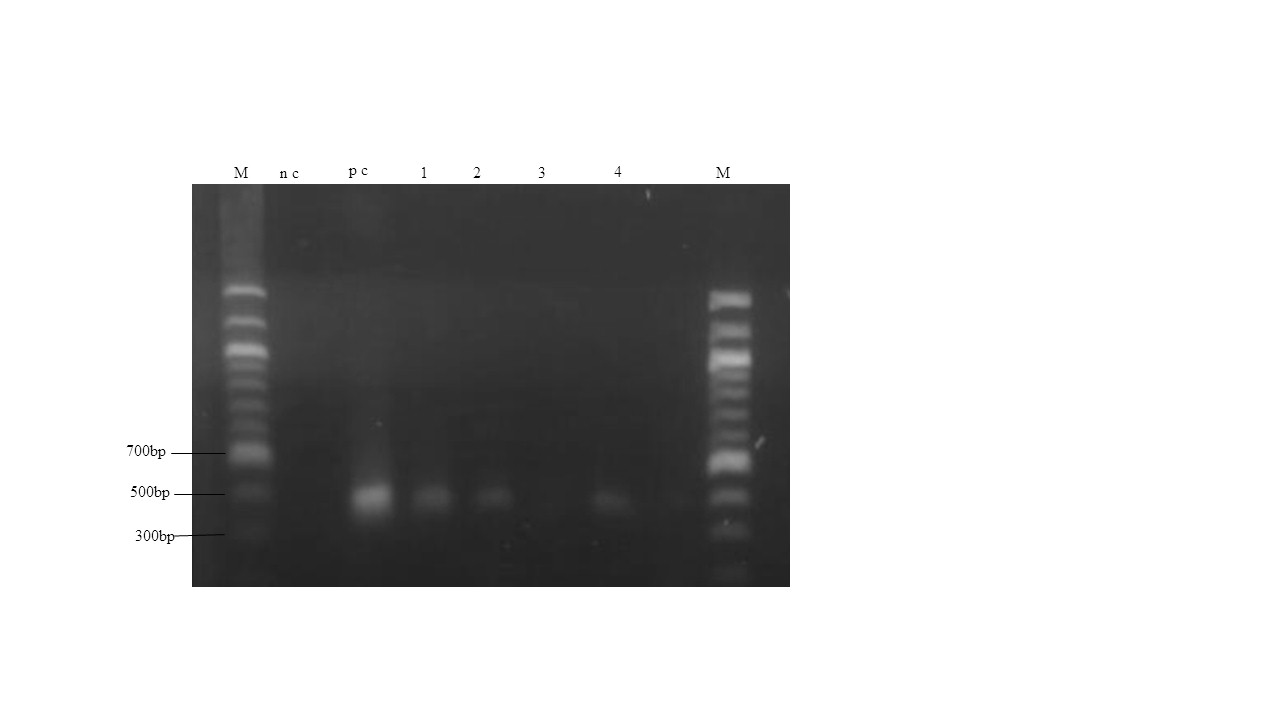


Figure S3: PCR amplification of 400bp size *strb* gene fragment

Key: M: 1 kb DNA ladder, 1-4 *E. coli* isolates from kienyeji mash, chick mash, kienyeji mash, growers mash respectively; nc-negative control, pc positive control .
